# Supplementary material for: Qualitative evaluation of the Safety and Improvement in Primary Care (SIPC) pilot collaborative in Scotland: perceptions and experiences of participating care teams
Source: HighWire-hosted journal article supplement (doi:10.1136/bmjopen-2015-009526), 2016-01-01

## Appendix 1 - Logic Model of the theories inherent in the SIPC pilot programme

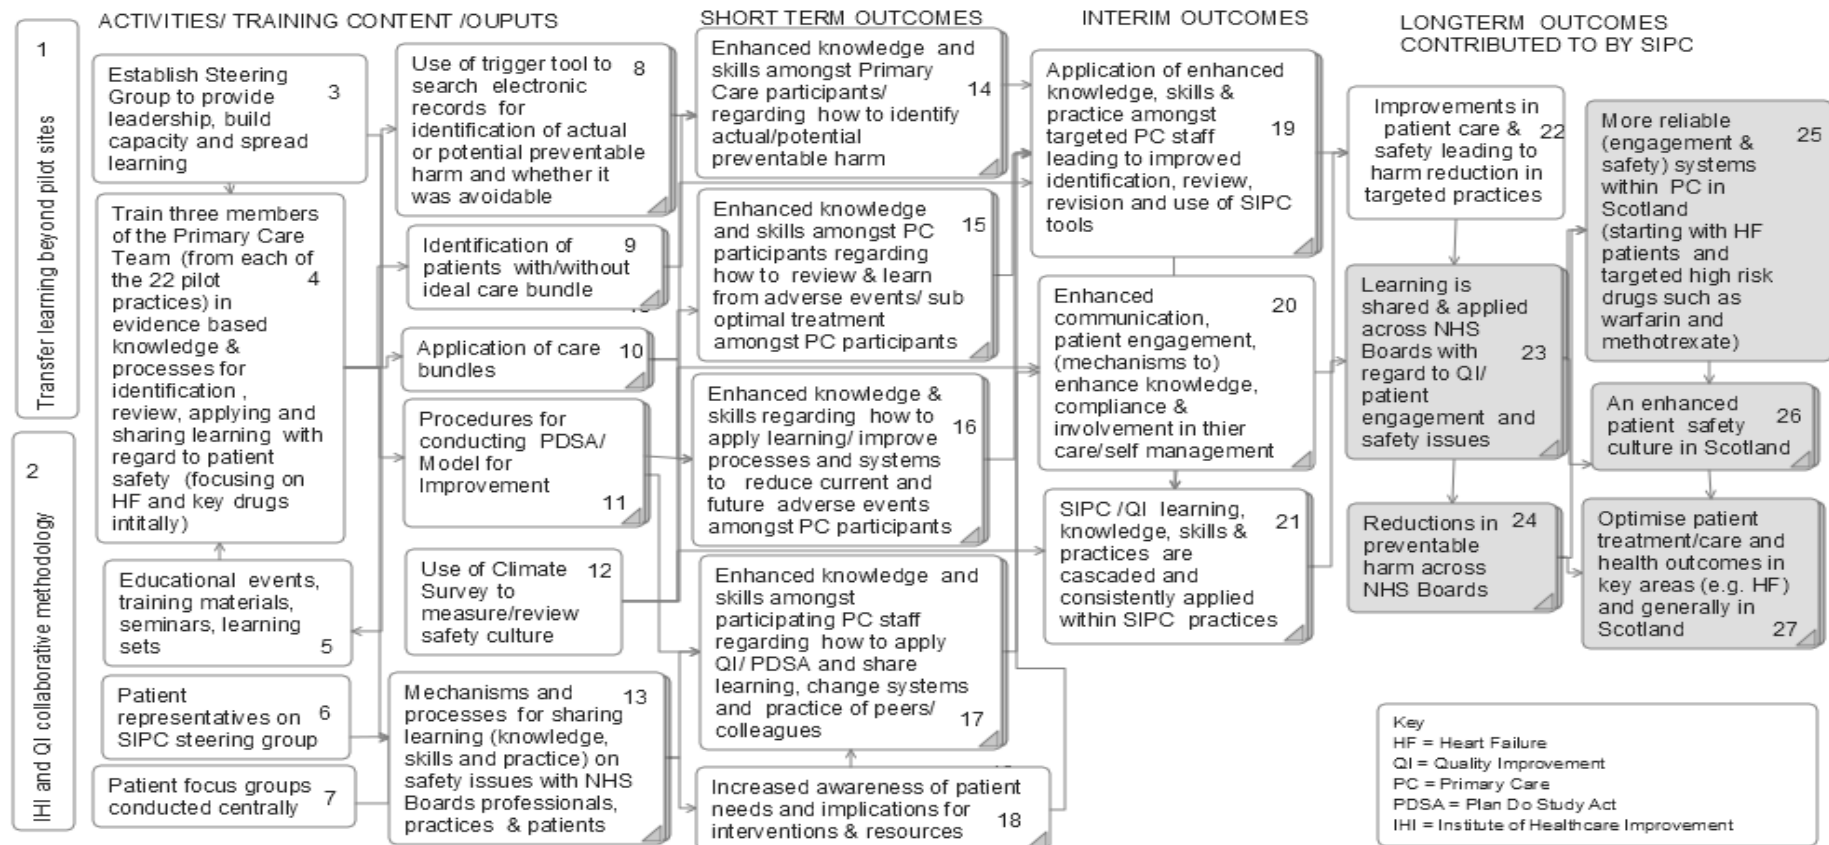

Supplement: bmjopen-2015-009526supp_appendix1.pdf [file bmjopen-2015-009526supp_appendix1.pdf]
