# Supplementary material for: Qualitative evaluation of the Safety and Improvement in Primary Care (SIPC) pilot collaborative in Scotland: perceptions and experiences of participating care teams
Source: HighWire-hosted journal article supplement (doi:10.1136/bmjopen-2015-009526), 2016-01-01
Supplement: bmjopen-2015-009526supp_appendix2.pdf [file bmjopen-2015-009526supp_appendix2.pdf]

**APPENDIX 2 – Examples of Data Run Charts Demonstrating Clinical Care Bundle Improvements by General Practice Teams as Part of the SIPC Pilot Programme**

Following regular data submissions, practices began to create run charts, showing improvements of each element of the bundle, as well as the composite score. Please refer to run chart below as an example of a practice which has achieved reliability, which in the case of the SIPC work, was set at 80%.

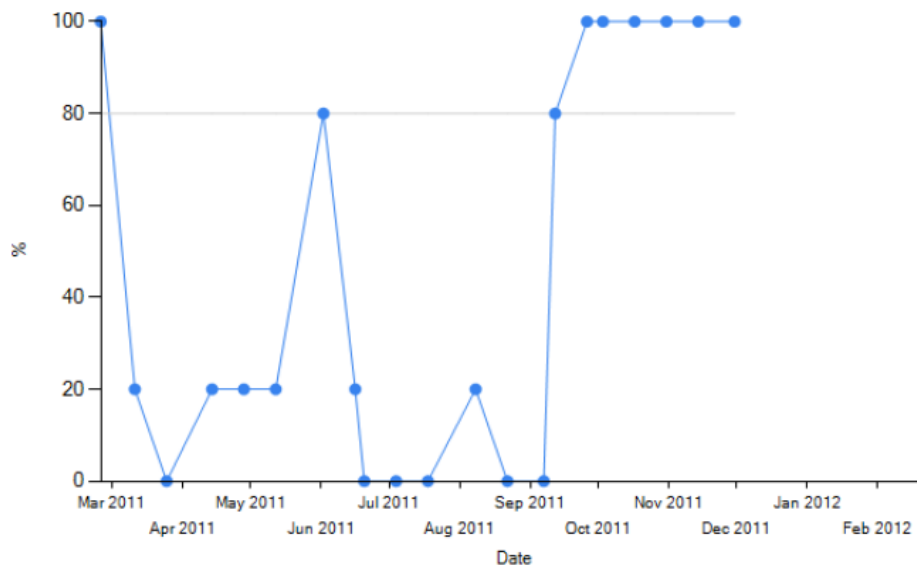

Practice X - The above run chart shows a practice which has achieved reliability when implementing the Warfarin care bundle.

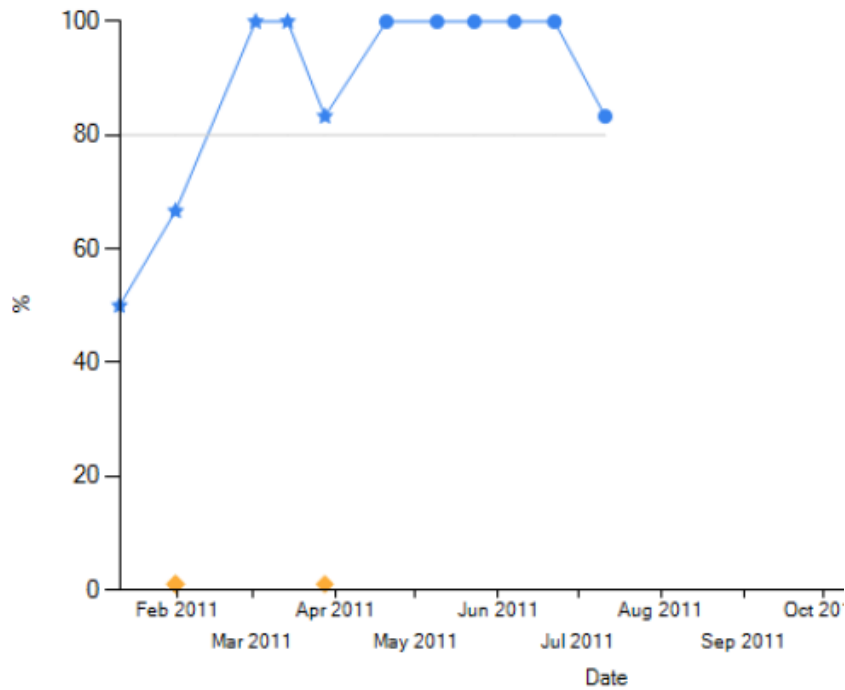

Practice Y - The above run chart shows a practice which has achieved reliability when implementing the DMARDS care bundle.

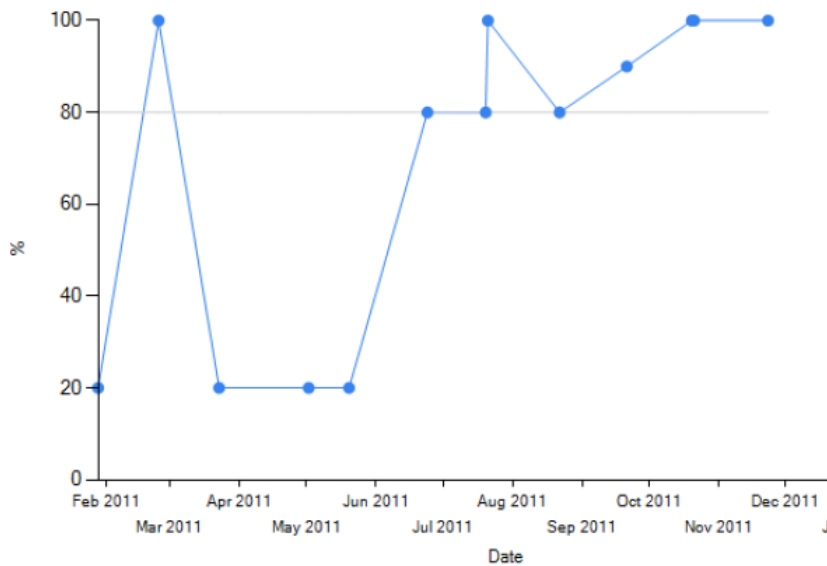

Practice Z - The above run chart shows a practice which has achieved reliability when implementing the Heart Failure care bundle.
